# Supplementary material for: Oxidative DNA cleavage mediated by a new unexpected [Pd(BAPP)][PdCl4] complex (BAPP = 1,4-bis(3-aminopropyl)piperazine): crystal structure, DNA binding and cytotoxic behavior
Source: Royal Society of Chemistry journal article supplement (doi:10.1039/d1ra07793g), 2022-01-01
Supplement: d1ra07793g1.pdf [file d1ra07793g1.pdf]

## Supporting Information

|                  |                                                                                                               |
|------------------|---------------------------------------------------------------------------------------------------------------|
| <b>Figure S1</b> | Mass spectrum of the [Pd(BAPP)][PdCl <sub>4</sub> ] complex                                                   |
| <b>Figure S2</b> | IR spectra of the ligand (A) and the complex(B)                                                               |
| <b>Figure S3</b> | <sup>1</sup> H NMR spectrum of [Pd(BAPP)][PdCl <sub>4</sub> ] complex                                         |
| <b>Figure S4</b> | <sup>13</sup> C NMR spectrum of [Pd(BAPP)][PdCl <sub>4</sub> ] complex                                        |
| <b>Figure S5</b> | UV-absorption spectra of BAPP and [Pd(BAPP)][PdCl <sub>4</sub> ] complex in DMSO.                             |
| <b>Figure S6</b> | UV-absorption spectra of the concentrated (A) and diluted (B) [Pd(BAPP)][PdCl <sub>4</sub> ] complex in DMSO  |
| <b>Figure S7</b> | UV-absorption spectrum of the [Pd(BAPP)][PdCl <sub>4</sub> ] complex at different time 0, 24 and 48 h in DMSO |
| <b>Figure S8</b> | TG and DTG curves of the [Pd(BAPP)][PdCl <sub>4</sub> ] complex                                               |
| <b>Table S1</b>  | All X-ray diffraction data for [Pd(BAPP)][PdCl <sub>4</sub> ]                                                 |
| <b>Table S2</b>  | Important DFT optimized bond lengths (Å) of BAPP and the Pd(II) complex                                       |
| <b>Table S3</b>  | Antimicrobial activity of the complexes and their corresponding free ligands                                  |
| <b>Table S4</b>  | Some selected pharmacokinetics data calculated for BAPP and [Pd(BAPP)][PdCl <sub>4</sub> ] complex:           |

Line#:1 R.Time:2.5(Scan#:305)  
MassPeaks:289  
RawMode:Single 2.5(305) BasePeak:70(167052)  
BG Mode:None Group 1 - Event 1

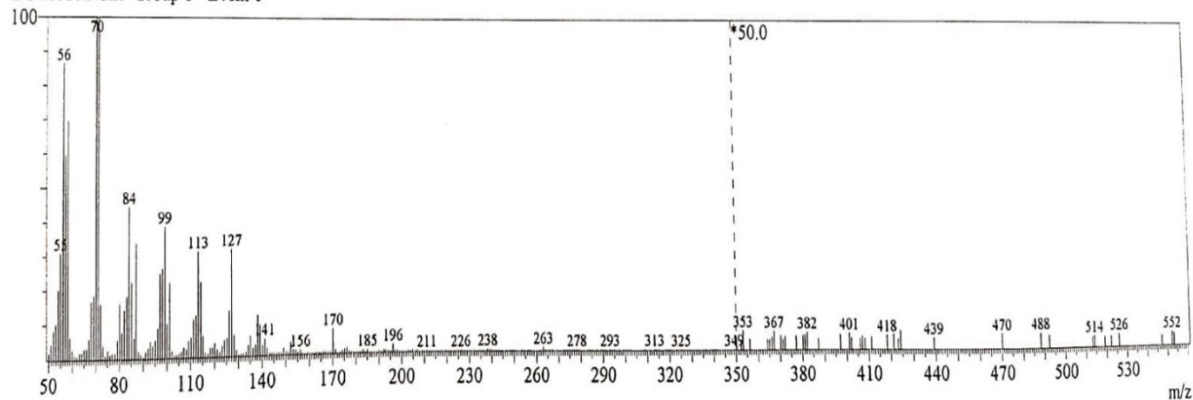

Figure S1 MS spectrum of the  $[Pd(BAPP)][PdCl_4]$  complex.

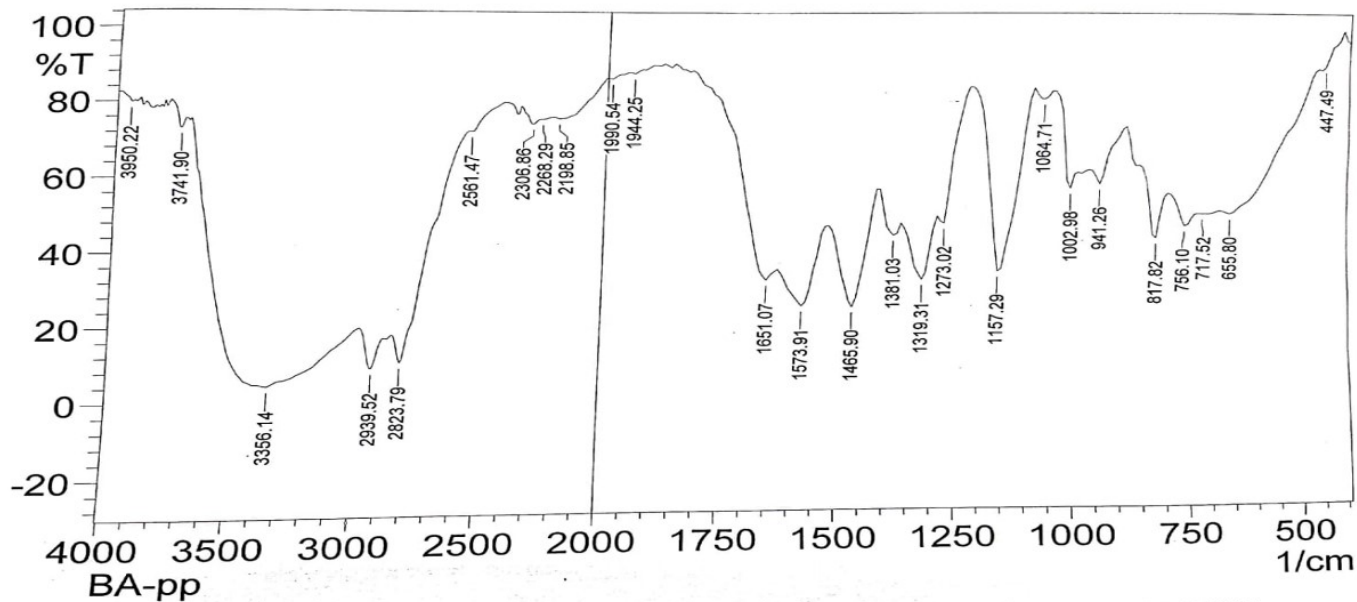

Figure S2 (A) IR spectrum of BAPP free ligand.

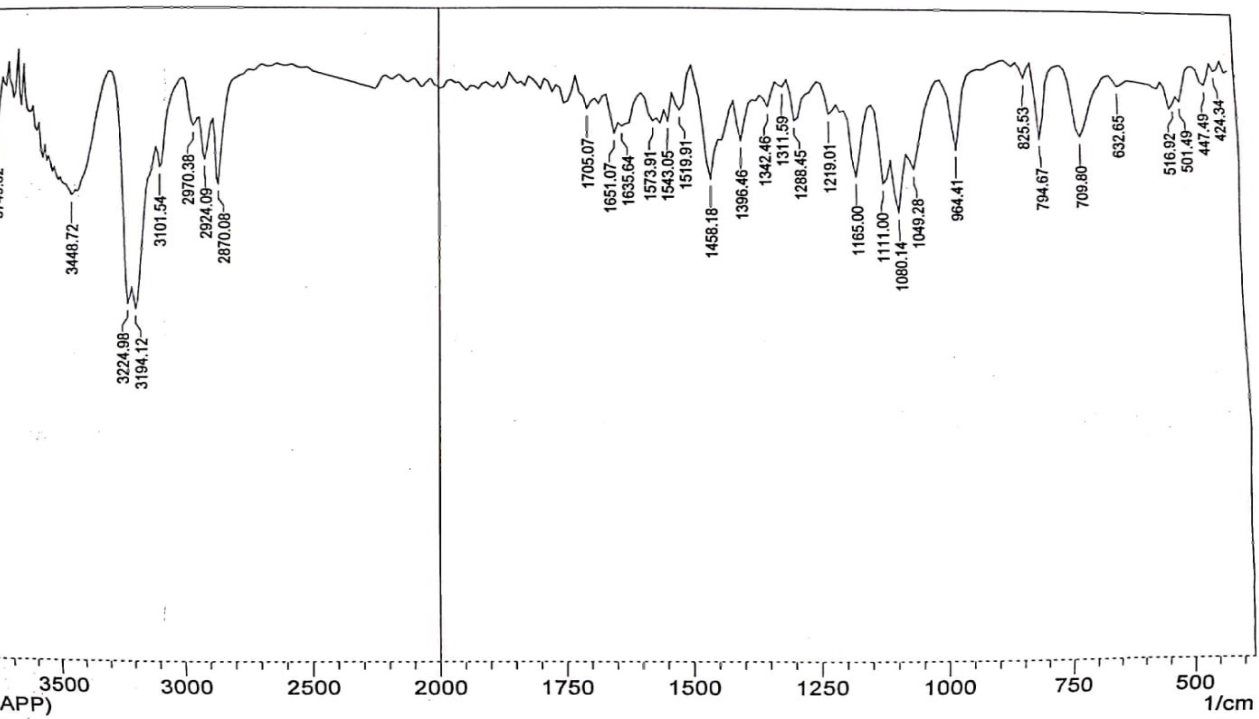

Figure S2 (B) IR spectrum of [Pd(BAPP)][PdCl<sub>4</sub>] complex.

MohammadRefat-BAPP-DMSO-H1  
Archive directory: /export/home/vnmr1/vnmrsys/data  
Sample directory: D05mm\_test\_12Mar2014-21:34:40  
File: PROTON  
Pulse Sequence: s2pu1  
Solvent: DMSO  
Temp. 30.0 C / 303.1 K  
Mercury-300SB "NMR300"  
Relax. delay 6.000 sec  
Pulse 45.0 degrees  
Acq. time 4.000 sec  
Width 6000.7 Hz  
17 repetitions  
OBSERVE N1, 300.0687872 MHz  
DATA PROCESSING  
Line broadening 0.1 Hz  
FT size 65536  
Total time 58 min, 55 sec  
Date: Mar 25 2021

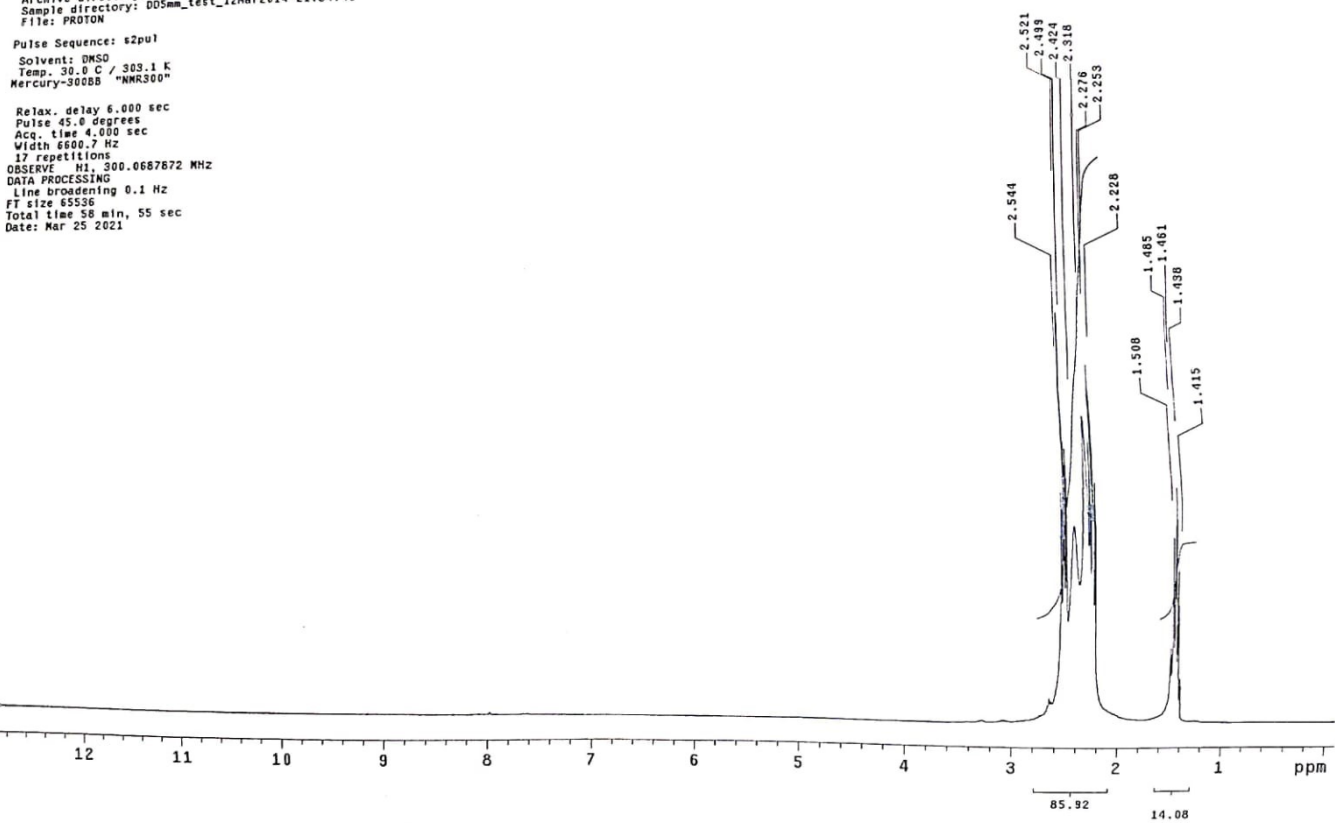

Figure S3  $^1\text{H}$  NMR spectrum of  $[\text{Pd}(\text{BAPP})][\text{PdCl}_4]$  complex

hammadRefat-BAPP-DMSO-C13  
Archive directory: /export/home/vnmri/vnmrsys/data  
Sample directory: D05mm\_test\_12Mar2014-21:34:40  
File: PROTON  
Pulse Sequence: s2pul  
Solvent: DMSO  
Ambient temperature  
Mercury-300BS "NMR300"  
Pulse 45.0 degrees  
Acq. time 1.707 sec  
Width 18761.7 Hz  
4 repetitions  
SERVE C13, 75.4523880 MHz  
COUPLE H1, 300.0702830 MHz  
Power 34 dB  
Continuously on  
LIZ-16 modulated  
A PROCESSING  
Line broadening 1.0 Hz  
File size 85536  
Total time 31 hr, 7 min, 12 sec  
Date: Mar 25 2021

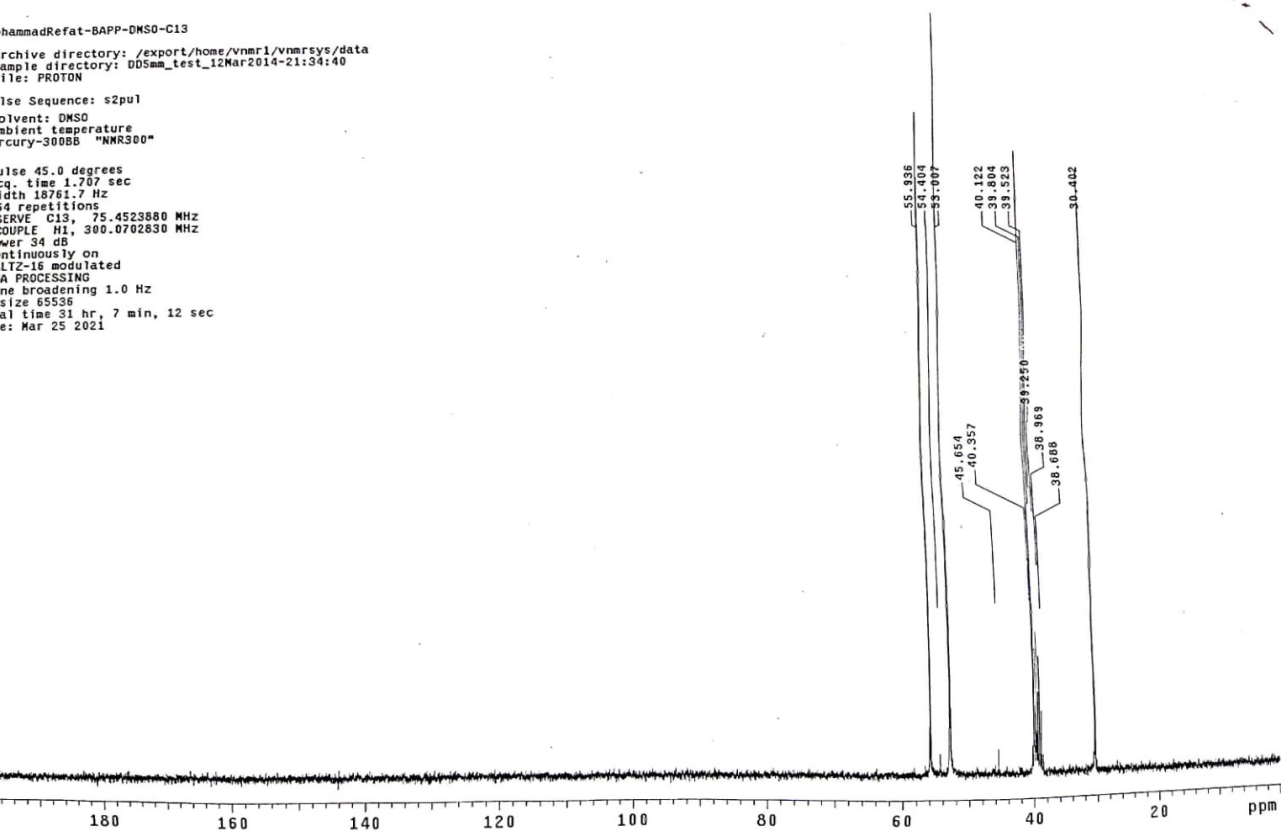

Figure S4  $^{13}\text{C}$  NMR spectrum of  $[\text{Pd}(\text{BAPP})][\text{PdCl}_4]$  complex

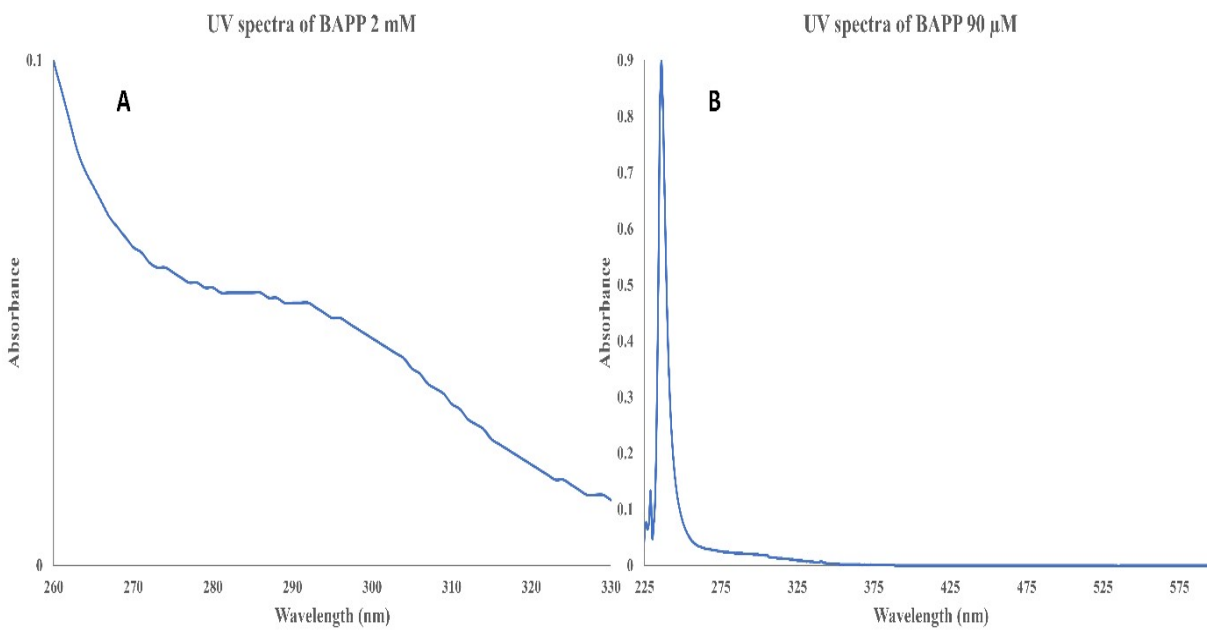

Figure S5 UV-absorption spectra of the concentrated **A** and diluted **B** BAPP free ligand in DMSO.

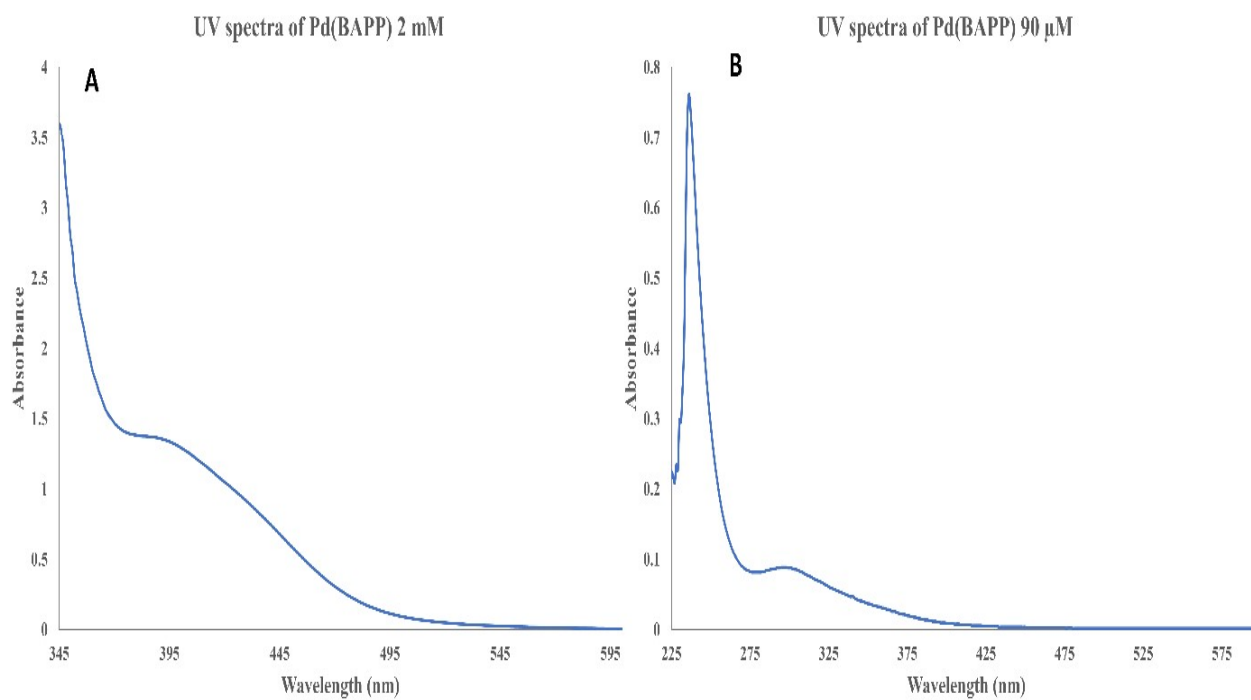

Figure S6 UV-absorption spectra of the concentrated (A) and diluted (B) [Pd(BAPP)][PdCl<sub>4</sub>] complex in DMSO

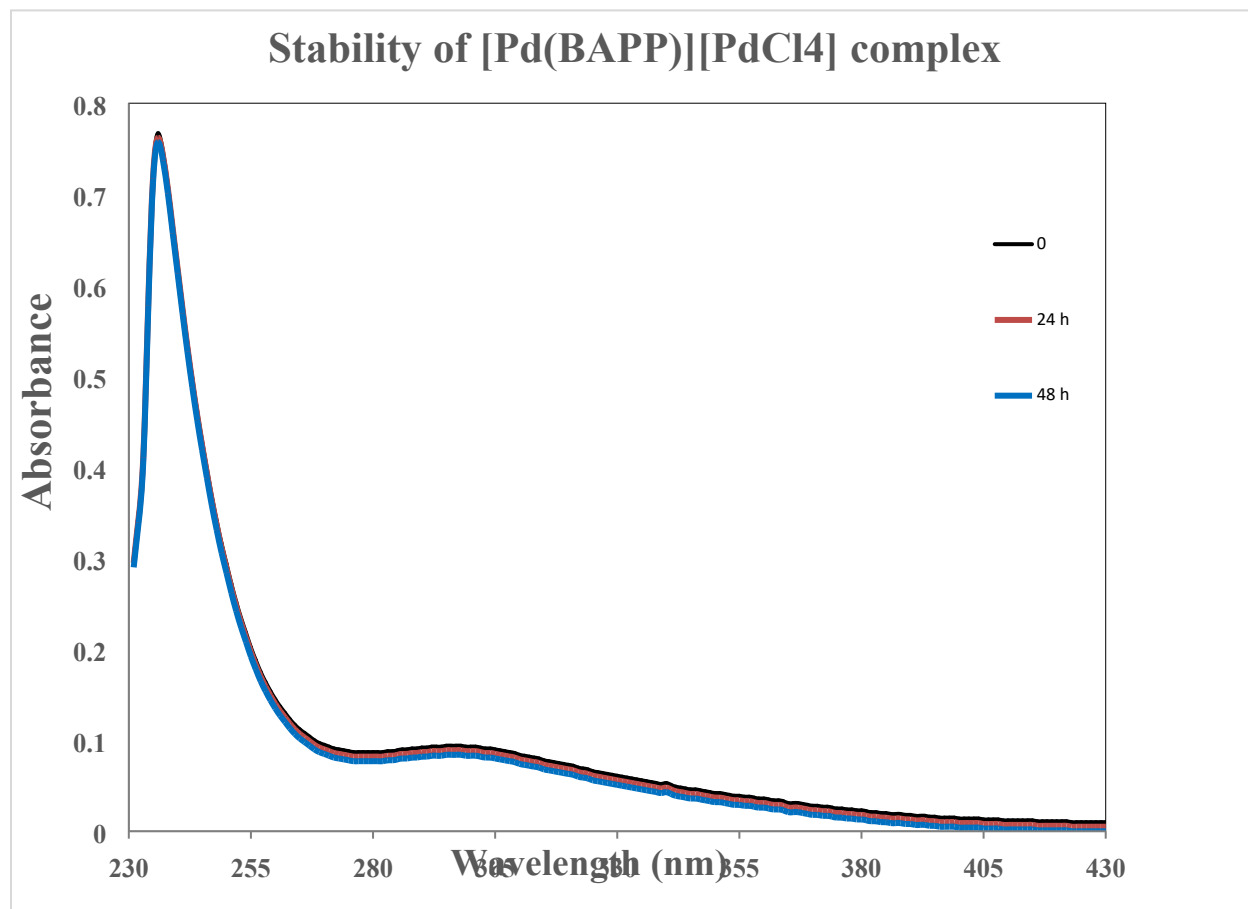

Figure S7 UV-absorption spectrum of the [Pd(BAPP)][PdCl<sub>4</sub>] complex at different time 0, 24 and 48 h in DMSO



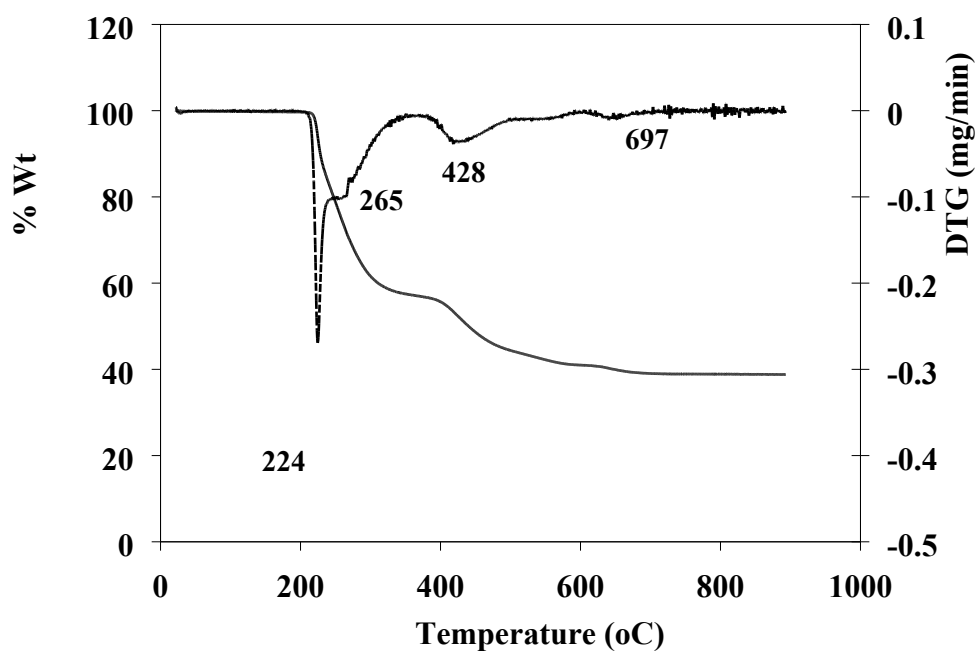

Figure S8 TG and DTG spectra of the [Pd(BAPP)][PdCl<sub>4</sub>] complex.

Table S1. X-ray diffraction data for [Pd(BAPP)][PdCl<sub>4</sub>]

a) Atomic coordinates ( $\times 10^4$ ) and equivalent isotropic displacement parameters ( $\text{\AA}^2 \times 10^3$ ) for [Pd(BAPP)][PdCl<sub>4</sub>].  $U(\text{eq})$  is defined as one third of the trace of the orthogonalized  $U^{ij}$  tensor.

|        | x       | y       | z       | U(eq) |
|--------|---------|---------|---------|-------|
| Pd(1)  | 5000    | 5000    | 0       | 30(1) |
| Cl(22) | 7437(1) | 2825(1) | 58(1)   | 44(1) |
| Cl(23) | 6212(1) | 6121(1) | 955(1)  | 42(1) |
| Pd(2)  | 3333(1) | 2966(1) | 2557(1) | 29(1) |
| N(8)   | 1086(4) | 4444(4) | 3029(2) | 35(1) |
| N(9)   | 1531(4) | 2363(4) | 2014(2) | 33(1) |
| N(13)  | 4858(4) | 3948(5) | 3056(2) | 44(1) |
| N(14)  | 5411(4) | 1240(4) | 2092(2) | 42(1) |
| C(10)  | 1056(6) | 5631(6) | 3641(3) | 50(1) |
| C(11)  | 2391(7) | 6379(6) | 3271(3) | 59(1) |
| C(12)  | 4111(6) | 5285(6) | 3625(3) | 58(1) |
| C(15)  | 2031(6) | 1070(6) | 1406(3) | 52(1) |
| C(16)  | 3629(6) | -253(6) | 1784(4) | 54(1) |
| C(17)  | 5179(6) | 184(6)  | 1463(3) | 55(1) |
| C(18)  | 280(5)  | 3253(6) | 3645(3) | 43(1) |
| C(19)  | 481(5)  | 2016(6) | 2987(3) | 43(1) |
| C(20)  | 563(5)  | 3936(5) | 1353(3) | 40(1) |
| C(21)  | 189(5)  | 5221(5) | 2009(3) | 43(1) |
| Pd(3)  | 5000    | 0       | 5000    | 39(1) |
| Cl(24) | 7232(1) | 931(2)  | 4745(1) | 61(1) |
| Cl(25) | 3477(2) | 2030(2) | 5866(1) | 60(1) |

b) Selected bond lengths [ $\text{\AA}$ ] and angles [ $^\circ$ ] for [Pd(BAPP)][PdCl<sub>4</sub>].

|              |            |
|--------------|------------|
| Pd(1)-Cl(23) | 2.3008(11) |
| Pd(1)-Cl(22) | 2.3128(11) |
| Pd(2)-N(8)   | 2.047(3)   |
| Pd(2)-N(13)  | 2.054(3)   |
| Pd(2)-N(9)   | 2.054(3)   |
| Pd(2)-N(14)  | 2.058(3)   |

c) Bond lengths [ $\text{\AA}$ ] and angles [ $^\circ$ ] for [Pd(BAPP)][PdCl<sub>4</sub>].

|                |            |              |          |
|----------------|------------|--------------|----------|
| Pd(1)-Cl(23)#1 | 2.3008(11) | C(11)-H(11B) | 0.97     |
| Pd(1)-Cl(23)   | 2.3008(11) | C(12)-H(12A) | 0.97     |
| Pd(1)-Cl(22)#1 | 2.3128(11) | C(12)-H(12B) | 0.97     |
| Pd(1)-Cl(22)   | 2.3128(11) | C(15)-C(16)  | 1.511(6) |
| Pd(2)-N(8)     | 2.047(3)   | C(15)-H(15A) | 0.97     |
| Pd(2)-N(13)    | 2.054(3)   | C(15)-H(15B) | 0.97     |
| Pd(2)-N(9)     | 2.054(3)   | C(16)-C(17)  | 1.502(6) |

|                         |            |                     |            |
|-------------------------|------------|---------------------|------------|
| Pd(2)-N(14)             | 2.058(3)   | C(16)-H(16A)        | 0.97       |
| N(8)-C(10)              | 1.476(5)   | C(16)-H(16B)        | 0.97       |
| N(8)-C(21)              | 1.498(4)   | C(17)-H(17A)        | 0.97       |
| N(8)-C(18)              | 1.502(5)   | C(17)-H(17B)        | 0.97       |
| N(9)-C(15)              | 1.481(5)   | C(18)-C(19)         | 1.519(6)   |
| N(9)-C(20)              | 1.486(5)   | C(18)-H(18A)        | 0.97       |
| N(9)-C(19)              | 1.494(4)   | C(18)-H(18B)        | 0.97       |
| N(13)-C(12)             | 1.483(6)   | C(19)-H(19A)        | 0.97       |
| N(13)-H(13A)            | 0.89       | C(19)-H(19B)        | 0.97       |
| N(13)-H(13B)            | 0.89       | C(20)-C(21)         | 1.528(6)   |
| N(14)-C(17)             | 1.473(6)   | C(20)-H(20A)        | 0.97       |
| N(14)-H(14A)            | 0.89       | C(20)-H(20B)        | 0.97       |
| N(14)-H(14B)            | 0.89       | C(21)-H(21A)        | 0.97       |
| C(10)-C(11)             | 1.502(6)   | C(21)-H(21B)        | 0.97       |
| C(10)-H(10A)            | 0.97       | Pd(3)-Cl(25)#2      | 2.3066(13) |
| C(10)-H(10B)            | 0.97       | Pd(3)-Cl(25)        | 2.3066(13) |
| C(11)-C(12)             | 1.512(7)   | Pd(3)-Cl(24)#2      | 2.3102(12) |
| C(11)-H(11A)            | 0.97       | Pd(3)-Cl(24)        | 2.3102(12) |
| Cl(23)#1-Pd(1)-Cl(23)   | 180.00(5)  | N(13)-C(12)-H(12B)  | 108.8      |
| Cl(23)#1-Pd(1)-Cl(22)#1 | 89.73(4)   | C(11)-C(12)-H(12B)  | 108.8      |
| Cl(23)-Pd(1)-Cl(22)#1   | 90.27(4)   | H(12A)-C(12)-H(12B) | 107.6      |
| Cl(23)#1-Pd(1)-Cl(22)   | 90.27(4)   | N(9)-C(15)-C(16)    | 112.5(3)   |
| Cl(23)-Pd(1)-Cl(22)     | 89.73(4)   | N(9)-C(15)-H(15A)   | 109.1      |
| Cl(22)#1-Pd(1)-Cl(22)   | 180        | C(16)-C(15)-H(15A)  | 109.1      |
| N(8)-Pd(2)-N(13)        | 98.61(14)  | N(9)-C(15)-H(15B)   | 109.1      |
| N(8)-Pd(2)-N(9)         | 73.44(13)  | C(16)-C(15)-H(15B)  | 109.1      |
| N(13)-Pd(2)-N(9)        | 170.55(14) | H(15A)-C(15)-H(15B) | 107.8      |
| N(8)-Pd(2)-N(14)        | 171.44(14) | C(17)-C(16)-C(15)   | 114.8(4)   |
| N(13)-Pd(2)-N(14)       | 89.30(14)  | C(17)-C(16)-H(16A)  | 108.6      |
| N(9)-Pd(2)-N(14)        | 98.96(14)  | C(15)-C(16)-H(16A)  | 108.6      |
| C(10)-N(8)-C(21)        | 112.3(3)   | C(17)-C(16)-H(16B)  | 108.6      |
| C(10)-N(8)-C(18)        | 112.1(3)   | C(15)-C(16)-H(16B)  | 108.6      |
| C(21)-N(8)-C(18)        | 106.7(3)   | H(16A)-C(16)-H(16B) | 107.6      |
| C(10)-N(8)-Pd(2)        | 119.1(3)   | N(14)-C(17)-C(16)   | 113.5(3)   |
| C(21)-N(8)-Pd(2)        | 103.4(2)   | N(14)-C(17)-H(17A)  | 108.9      |
| C(18)-N(8)-Pd(2)        | 102.0(2)   | C(16)-C(17)-H(17A)  | 108.9      |
| C(15)-N(9)-C(20)        | 111.4(3)   | N(14)-C(17)-H(17B)  | 108.9      |
| C(15)-N(9)-C(19)        | 112.0(3)   | C(16)-C(17)-H(17B)  | 108.9      |
| C(20)-N(9)-C(19)        | 107.6(3)   | H(17A)-C(17)-H(17B) | 107.7      |
| C(15)-N(9)-Pd(2)        | 119.5(3)   | N(8)-C(18)-C(19)    | 108.3(3)   |
| C(20)-N(9)-Pd(2)        | 101.0(2)   | N(8)-C(18)-H(18A)   | 110        |

|                     |          |                       |           |
|---------------------|----------|-----------------------|-----------|
| C(19)-N(9)-Pd(2)    | 104.2(2) | C(19)-C(18)-H(18A)    | 110       |
| C(12)-N(13)-Pd(2)   | 119.2(3) | N(8)-C(18)-H(18B)     | 110       |
| C(12)-N(13)-H(13A)  | 107.5    | C(19)-C(18)-H(18B)    | 110       |
| Pd(2)-N(13)-H(13A)  | 107.5    | H(18A)-C(18)-H(18B)   | 108.4     |
| C(12)-N(13)-H(13B)  | 107.5    | N(9)-C(19)-C(18)      | 107.8(3)  |
| Pd(2)-N(13)-H(13B)  | 107.5    | N(9)-C(19)-H(19A)     | 110.1     |
| H(13A)-N(13)-H(13B) | 107      | C(18)-C(19)-H(19A)    | 110.1     |
| C(17)-N(14)-Pd(2)   | 118.3(3) | N(9)-C(19)-H(19B)     | 110.1     |
| C(17)-N(14)-H(14A)  | 107.7    | C(18)-C(19)-H(19B)    | 110.1     |
| Pd(2)-N(14)-H(14A)  | 107.7    | H(19A)-C(19)-H(19B)   | 108.5     |
| C(17)-N(14)-H(14B)  | 107.7    | N(9)-C(20)-C(21)      | 108.2(3)  |
| Pd(2)-N(14)-H(14B)  | 107.7    | N(9)-C(20)-H(20A)     | 110.1     |
| H(14A)-N(14)-H(14B) | 107.1    | C(21)-C(20)-H(20A)    | 110.1     |
| N(8)-C(10)-C(11)    | 112.9(3) | N(9)-C(20)-H(20B)     | 110.1     |
| N(8)-C(10)-H(10A)   | 109      | C(21)-C(20)-H(20B)    | 110.1     |
| C(11)-C(10)-H(10A)  | 109      | H(20A)-C(20)-H(20B)   | 108.4     |
| N(8)-C(10)-H(10B)   | 109      | N(8)-C(21)-C(20)      | 107.7(3)  |
| C(11)-C(10)-H(10B)  | 109      | N(8)-C(21)-H(21A)     | 110.2     |
| H(10A)-C(10)-H(10B) | 107.8    | C(20)-C(21)-H(21A)    | 110.2     |
| C(10)-C(11)-C(12)   | 113.7(4) | N(8)-C(21)-H(21B)     | 110.2     |
| C(10)-C(11)-H(11A)  | 108.8    | C(20)-C(21)-H(21B)    | 110.2     |
| C(12)-C(11)-H(11A)  | 108.8    | H(21A)-C(21)-H(21B)   | 108.5     |
| C(10)-C(11)-H(11B)  | 108.8    | Cl(25)#2-Pd(3)-Cl(25) | 180.00(5) |
|                     |          | Cl(25)#2-Pd(3)-       |           |
| C(12)-C(11)-H(11B)  | 108.8    | Cl(24)#2              | 90.77(5)  |
| H(11A)-C(11)-H(11B) | 107.7    | Cl(25)-Pd(3)-Cl(24)#2 | 89.23(5)  |
| N(13)-C(12)-C(11)   | 114.0(4) | Cl(25)#2-Pd(3)-Cl(24) | 89.23(5)  |
| N(13)-C(12)-H(12A)  | 108.8    | Cl(25)-Pd(3)-Cl(24)   | 90.77(5)  |
| C(11)-C(12)-H(12A)  | 108.8    | Cl(24)#2-Pd(3)-Cl(24) | 180       |

Symmetry transformations used to generate equivalent atoms:

#1 -x+1,-y+1,-z #2 -x+1,-y,-z+1

d) Anisotropic displacement parameters ( $\text{\AA}^2 \times 10^3$ ) for  $[\text{Pd}(\text{BAPP})][\text{PdCl}_4]$ . The anisotropic displacement factor exponent takes the form:  $-2p^2 [h^2 a^{*2} U^{11} + \dots + 2 h k a^* b^* U^{12}]$

|        | $U^{11}$ | $U^{22}$ | $U^{33}$ | $U^{23}$ | $U^{13}$ | $U^{12}$ |
|--------|----------|----------|----------|----------|----------|----------|
| Pd(1)  | 29(1)    | 31(1)    | 29(1)    | -6(1)    | 0(1)     | -11(1)   |
| Cl(22) | 34(1)    | 40(1)    | 56(1)    | -11(1)   | -1(1)    | -8(1)    |
| Cl(23) | 40(1)    | 45(1)    | 46(1)    | -16(1)   | -5(1)    | -16(1)   |
| Pd(2)  | 28(1)    | 33(1)    | 26(1)    | -5(1)    | -3(1)    | -12(1)   |
| N(8)   | 33(2)    | 36(2)    | 33(2)    | -8(1)    | 0(1)     | -10(2)   |
| N(9)   | 33(2)    | 37(2)    | 31(2)    | -8(1)    | -6(1)    | -13(2)   |
| N(13)  | 46(2)    | 52(3)    | 38(2)    | 2(2)     | -12(2)   | -28(2)   |
| N(14)  | 40(2)    | 44(2)    | 35(2)    | -1(2)    | 0(1)     | -10(2)   |
| C(10)  | 62(3)    | 45(3)    | 45(2)    | -21(2)   | 3(2)     | -15(3)   |
| C(11)  | 90(4)    | 45(3)    | 51(3)    | -20(2)   | 3(2)     | -31(3)   |

|        |       |       |       |        |        |        |
|--------|-------|-------|-------|--------|--------|--------|
| C(12)  | 85(4) | 69(4) | 41(2) | -14(2) | -7(2)  | -49(3) |
| C(15)  | 63(3) | 55(4) | 50(3) | -24(2) | -6(2)  | -26(3) |
| C(16)  | 72(3) | 35(3) | 62(3) | -20(2) | 10(2)  | -25(3) |
| C(17)  | 61(3) | 42(3) | 57(3) | -18(2) | 8(2)   | -11(3) |
| C(18)  | 37(2) | 57(3) | 37(2) | -9(2)  | 8(2)   | -21(2) |
| C(19)  | 41(3) | 53(3) | 41(2) | -5(2)  | 4(2)   | -28(2) |
| C(20)  | 32(2) | 51(3) | 33(2) | -4(2)  | -8(2)  | -10(2) |
| C(21)  | 34(2) | 46(3) | 42(2) | 0(2)   | -6(2)  | -8(2)  |
| Pd(3)  | 37(1) | 44(1) | 32(1) | 3(1)   | -7(1)  | -16(1) |
| Cl(24) | 47(1) | 68(1) | 65(1) | 12(1)  | -14(1) | -31(1) |
| Cl(25) | 62(1) | 55(1) | 55(1) | -10(1) | -5(1)  | -9(1)  |

e) Hydrogen coordinates ( $\times 10^4$ ) and isotropic displacement parameters ( $\text{\AA}^2 \times 10^{-3}$ ) for  $[\text{Pd}(\text{BAPP})][\text{PdCl}_4]$ .

|        | x     | y     | z    | U(eq) |
|--------|-------|-------|------|-------|
| H(13A) | 5596  | 3156  | 3481 | 52    |
| H(13B) | 5425  | 4296  | 2484 | 52    |
| H(14A) | 6090  | 1738  | 1715 | 51    |
| H(14B) | 5935  | 616   | 2678 | 51    |
| H(10A) | 1196  | 5105  | 4389 | 60    |
| H(10B) | -23   | 6473  | 3579 | 60    |
| H(11A) | 2108  | 7352  | 3541 | 71    |
| H(11B) | 2412  | 6683  | 2498 | 71    |
| H(12A) | 4840  | 5923  | 3517 | 69    |
| H(12B) | 4047  | 4833  | 4384 | 69    |
| H(15A) | 2173  | 1530  | 657  | 62    |
| H(15B) | 1147  | 612   | 1477 | 62    |
| H(16A) | 3555  | -563  | 2556 | 65    |
| H(16B) | 3729  | -1183 | 1504 | 65    |
| H(17A) | 6137  | -795  | 1542 | 66    |
| H(17B) | 5134  | 719   | 716  | 66    |
| H(18A) | -893  | 3801  | 3784 | 52    |
| H(18B) | 804   | 2727  | 4323 | 52    |
| H(19A) | 1012  | 940   | 3398 | 52    |
| H(19B) | -601  | 2084  | 2786 | 52    |
| H(20A) | -468  | 3883  | 1154 | 48    |
| H(20B) | 1201  | 4198  | 707  | 48    |
| H(21A) | 567   | 6097  | 1618 | 52    |
| H(21B) | -1001 | 5653  | 2157 | 52    |

f) Torsion angles [ $^\circ$ ] for  $[\text{Pd}(\text{BAPP})][\text{PdCl}_4]$ .

|                         |          |
|-------------------------|----------|
| C(21)-N(8)-C(10)-C(11)  | -83.1(4) |
| C(18)-N(8)-C(10)-C(11)  | 156.8(4) |
| Pd(2)-N(8)-C(10)-C(11)  | 37.9(5)  |
| N(8)-C(10)-C(11)-C(12)  | -75.7(5) |
| Pd(2)-N(13)-C(12)-C(11) | -32.4(5) |

|                         |           |
|-------------------------|-----------|
| C(10)-C(11)-C(12)-N(13) | 72.7(5)   |
| C(20)-N(9)-C(15)-C(16)  | 151.3(4)  |
| C(19)-N(9)-C(15)-C(16)  | -88.2(4)  |
| Pd(2)-N(9)-C(15)-C(16)  | 34.1(5)   |
| N(9)-C(15)-C(16)-C(17)  | -73.8(5)  |
| Pd(2)-N(14)-C(17)-C(16) | -36.2(5)  |
| C(15)-C(16)-C(17)-N(14) | 75.7(5)   |
| C(10)-N(8)-C(18)-C(19)  | -175.9(3) |
| C(21)-N(8)-C(18)-C(19)  | 60.7(4)   |
| Pd(2)-N(8)-C(18)-C(19)  | -47.4(3)  |
| C(15)-N(9)-C(19)-C(18)  | 170.7(3)  |
| C(20)-N(9)-C(19)-C(18)  | -66.6(4)  |
| Pd(2)-N(9)-C(19)-C(18)  | 40.1(4)   |
| N(8)-C(18)-C(19)-N(9)   | 4.7(4)    |
| C(15)-N(9)-C(20)-C(21)  | -176.5(3) |
| C(19)-N(9)-C(20)-C(21)  | 60.4(4)   |
| Pd(2)-N(9)-C(20)-C(21)  | -48.6(3)  |
| C(10)-N(8)-C(21)-C(20)  | 169.9(3)  |
| C(18)-N(8)-C(21)-C(20)  | -66.8(4)  |
| Pd(2)-N(8)-C(21)-C(20)  | 40.2(3)   |
| N(9)-C(20)-C(21)-N(8)   | 5.7(4)    |

---

Symmetry transformations used to generate equivalent atoms:

#1 -x+1,-y+1,-z #2 -x+1,-y,-z+1

g) Hydrogen bonds for [Pd(BAPP)][PdCl<sub>4</sub>] [Å and °].

| D-H...A                 | d(D-H) | d(H...A) | d(D...A) | <(DHA) |
|-------------------------|--------|----------|----------|--------|
| N(13)-H(13A)...Cl(24)   | 0.89   | 2.39     | 3.268(3) | 171.6  |
| N(13)-H(13B)...Cl(23)   | 0.89   | 2.45     | 3.300(3) | 160.2  |
| N(14)-H(14A)...Cl(22)   | 0.89   | 2.47     | 3.294(3) | 154.6  |
| N(14)-H(14B)...Cl(25)#2 | 0.89   | 2.60     | 3.395(3) | 149.0  |
| C(10)-H(10B)...Cl(25)#3 | 0.97   | 2.88     | 3.783(5) | 155.8  |
| C(12)-H(12B)...Cl(25)   | 0.97   | 2.95     | 3.747(5) | 140.5  |
| C(16)-H(16B)...Cl(23)#4 | 0.97   | 2.80     | 3.596(5) | 139.4  |
| C(19)-H(19A)...Cl(24)#2 | 0.97   | 2.83     | 3.676(4) | 146.1  |
| C(20)-H(20A)...Cl(22)#5 | 0.97   | 2.94     | 3.846(4) | 156.2  |
| C(20)-H(20A)...Cl(23)#5 | 0.97   | 2.86     | 3.592(4) | 133.1  |
| C(20)-H(20B)...Cl(23)#1 | 0.97   | 2.89     | 3.816(4) | 160.7  |
| C(21)-H(21A)...Cl(22)#1 | 0.97   | 2.80     | 3.658(4) | 147.6  |
| C(21)-H(21B)...Cl(23)#5 | 0.97   | 2.86     | 3.573(4) | 131.4  |

Symmetry transformations used to generate equivalent atoms:

#1 -x+1,-y+1,-z #2 -x+1,-y,-z+1 #3 -x,-y+1,-z+1

#4 x,y-1,z #5 x-1,y,z

Table S2. Important DFT optimized bond lengths (Å) of BAPP and the Pd(II) complex

| Type of bond | Bond length (Å) |                |
|--------------|-----------------|----------------|
|              | BAPP            | Pd(II) complex |
| N1- - - N2   | 2.885           | 2.500          |
| N1- - - N3   | 4.390           | 3.215          |
| N2- - - N4   | 4.459           | 3.049          |
| N3- - - N4   | 11.413          | 3.085          |

Table S3 Antimicrobial activity of the complex and the free ligand

| Compounds                                 | Microbial species    |                |                    |                  |                  |                    |
|-------------------------------------------|----------------------|----------------|--------------------|------------------|------------------|--------------------|
|                                           | Bacteria             |                |                    |                  | Fungus           |                    |
|                                           | <i>P. aeruginosa</i> | <i>E. coli</i> | <i>B. subtilis</i> | <i>S. aureus</i> | <i>A. flavus</i> | <i>C. albicans</i> |
| BAPP                                      | 21                   | 20             | 20                 | 21               | 16               | 13                 |
| Pd(BAPP) complex                          | 12                   | 14             | 12                 | 13               | 13               | 20                 |
| Control (DMSO)                            | 0                    | 0              | 0                  | 0                | 0                | 0                  |
| Standard<br>Ampicilline<br>Amphotericin B | 17<br>-              | 22<br>-        | 20<br>-            | 18<br>-          | -<br>17          | -<br>19            |

Table S4 Some selected pharmacokinetics data calculated for BAPP and [Pd(BAPP)][PdCl<sub>4</sub>] complex:

| ADME FACTOR <sup>a</sup>   | BAPP                                           | complex                                                                        |
|----------------------------|------------------------------------------------|--------------------------------------------------------------------------------|
| Physicochemical Properties |                                                |                                                                                |
| Formula                    | C <sub>10</sub> H <sub>24</sub> N <sub>4</sub> | C <sub>10</sub> H <sub>24</sub> Cl <sub>4</sub> N <sub>4</sub> Pd <sub>2</sub> |
| Molecular weight           | 200.32 g/mol                                   | 554.98 g/mol                                                                   |
| Num. heavy atoms           | 14                                             | 20                                                                             |
| Fraction Csp <sup>3</sup>  | 1.00                                           | 1.00                                                                           |
| Molar Refractivity         | 67.11                                          | 98.35                                                                          |
| TPSA                       | 58.52 Å <sup>2</sup>                           | 58.52 Å <sup>2</sup>                                                           |
| Lipophilicity              |                                                |                                                                                |



|                             |                |                    |
|-----------------------------|----------------|--------------------|
| Log $P_{o/w}$ (iLOGP)       | 2.23           | 0.00               |
| Log $P_{o/w}$ (XLOGP3)      | -1.43          | 3.10               |
| Log $P_{o/w}$ (WLOGP)       | -1.46          | 0.54               |
| Log $P_{o/w}$ (MLOGP)       | -0.21          | 0.90               |
| Log $P_{o/w}$ (SILICOS-IT)  | -0.01          | -2.46              |
| Consensus Log $P_{o/w}$     | -0.18          | 0.42               |
| Water Solubility            |                |                    |
| Log $S$ (ESOL)              | 0.21           | -5.23              |
| Class                       | Highly soluble | Moderately soluble |
| Log $S$ (Ali)               | 0.70           | -4.00              |
| Class                       | Highly soluble | Soluble            |
| Log $S$ (SILICOS-IT)        | -1.38          | -3.22              |
| Class                       | Soluble        | Soluble            |
| Pharmacokinetics            |                |                    |
| GI absorption               | High           | High               |
| BBB permeant                | No             | No                 |
| P-gp substrate              | Yes            | Yes                |
| CYP1A2 inhibitor            | No             | No                 |
| CYP2C19 inhibitor           | No             | No                 |
| CYP2C9 inhibitor            | No             | No                 |
| CYP2D6 inhibitor            | No             | No                 |
| CYP3A4 inhibitor            | No             | No                 |
| Log $K_p$ (skin permeation) | -8.54 cm/s     | -7.48 cm/s         |
| Medicinal Chemistry         |                |                    |
| PAINS                       | 0 alert        | 0 alert            |
| Brenk                       | 0 alert        | 0 alert            |
| Synthetic accessibility     | 1.88           | 5.18               |

(TPSA: Topological Polar Surface Area), Consensus Log $P_{o/w}$  : Average of all five predictions, GI absorption: Gastrointestinal absorption, P-gp substrate: P-glycoprotein substrate, CYP1A2 inhibitor: Cytochrome P450 1A2 inhibitor, CYP2C19 inhibitor: Cytochrome P450 2C19

inhibitor, CYP2C9 inhibitor: Cytochrome P450 2C9 inhibitor), CYP2D6 inhibitor: Cytochrome P450 2D6 inhibitor, CYP3A4 inhibitor: Cytochrome P450 3A4 inhibitor, PAINS: Pan Assay Interference Structures, Brenk: Structural Alert, Synthetic accessibility score: from 1 (very easy) to 10 (very difficult).
